# Supplementary material for: Characterization of bacterioplankton communities and quantification of organic carbon pools off the Galapagos Archipelago under contrasting environmental conditions
Source: PubMed Central journal article supplement (PMC6282939; doi:10.7717/peerj.5984), 2018-12-03
Supplement: peerj-06-5984-s001.pdf [file peerj-06-5984-s001.pdf]

## Free-living

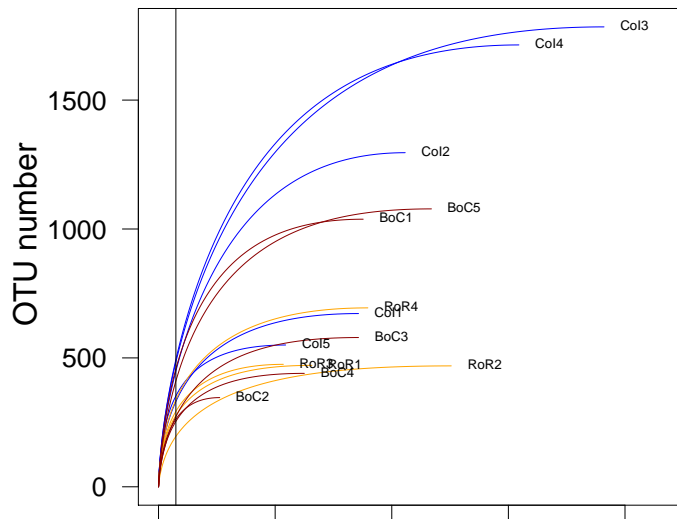

## Particle-attached

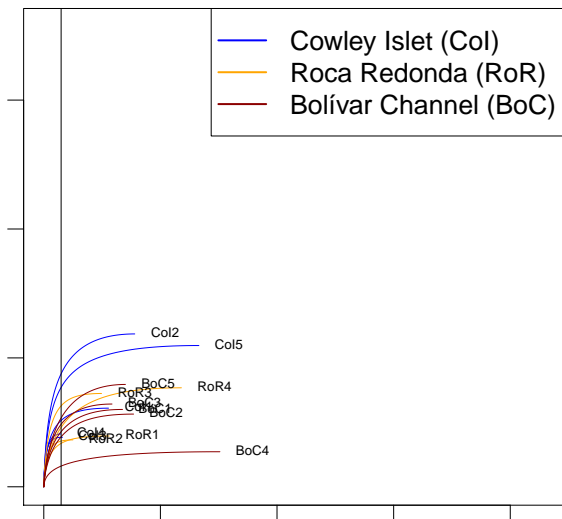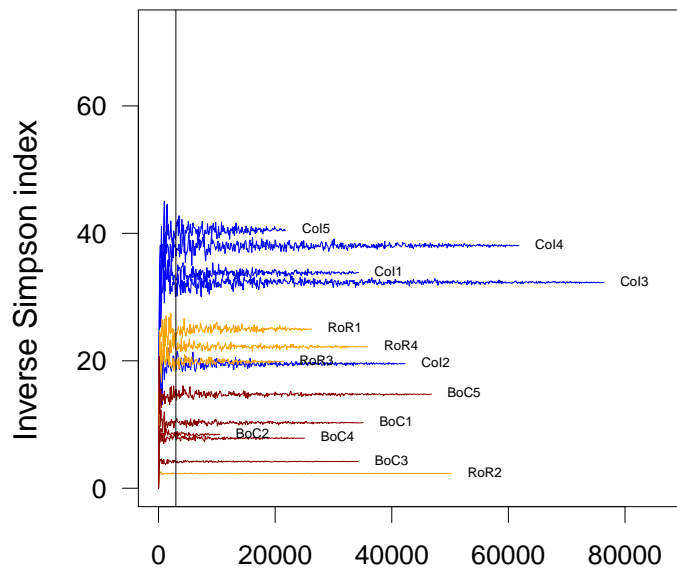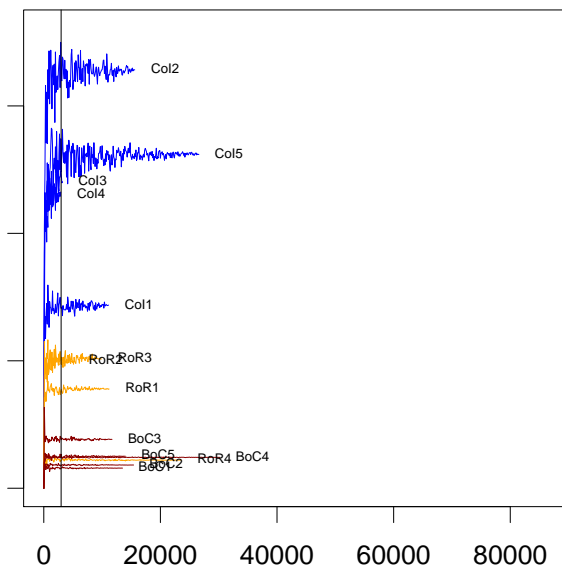

Number of sequences
