# Supplementary material for: Characterization of bacterioplankton communities and quantification of organic carbon pools off the Galapagos Archipelago under contrasting environmental conditions
Source: PubMed Central journal article supplement (PMC6282939; doi:10.7717/peerj.5984), 2018-12-03

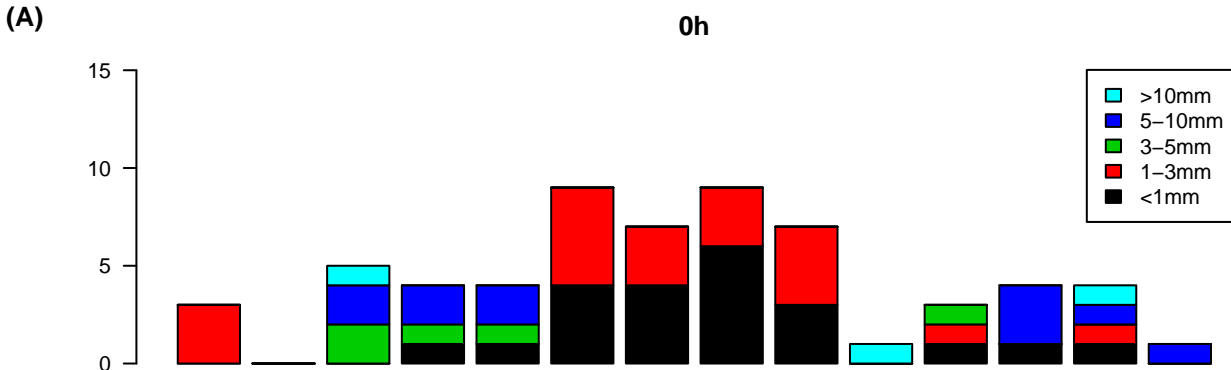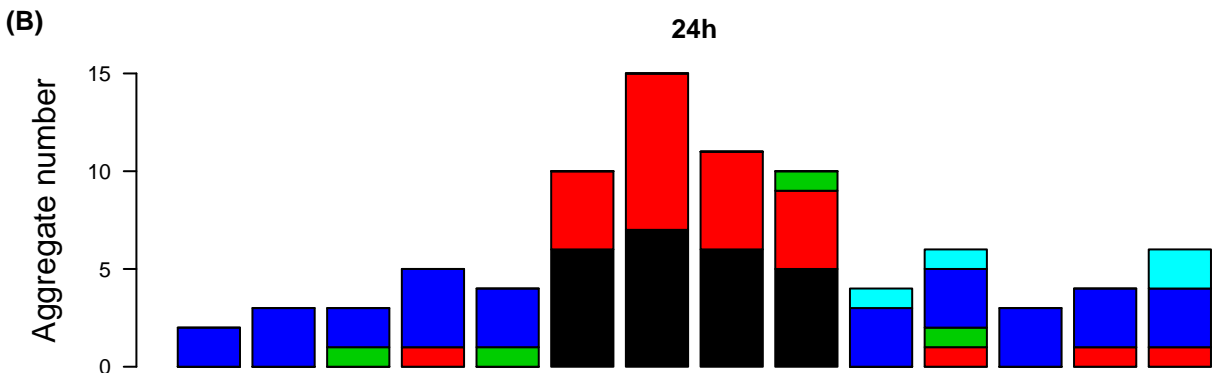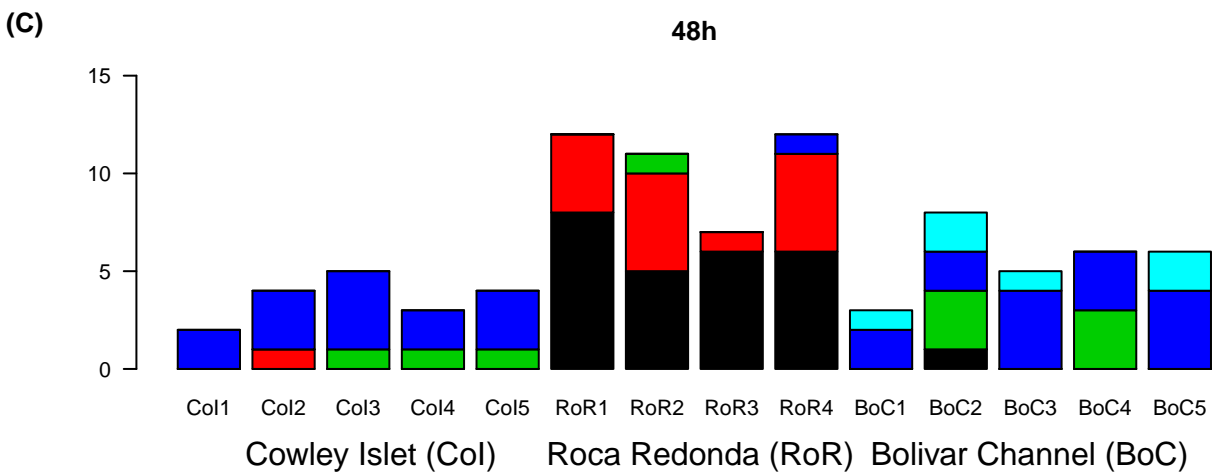

Supplement: peerj-06-5984-s002.pdf [file peerj-06-5984-s002.pdf]
