# Supplementary material for: Characterization of bacterioplankton communities and quantification of organic carbon pools off the Galapagos Archipelago under contrasting environmental conditions
Source: PubMed Central journal article supplement (PMC6282939; doi:10.7717/peerj.5984), 2018-12-03

**(A) Free-living**

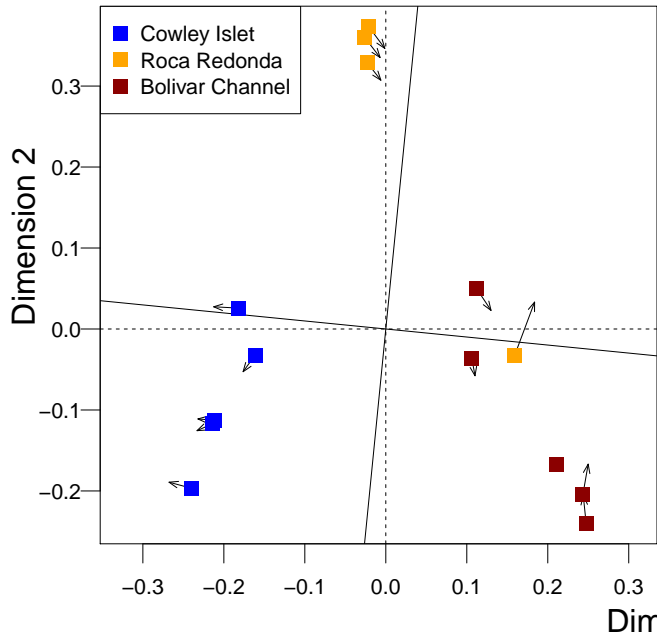

**(B) Particle-attached**

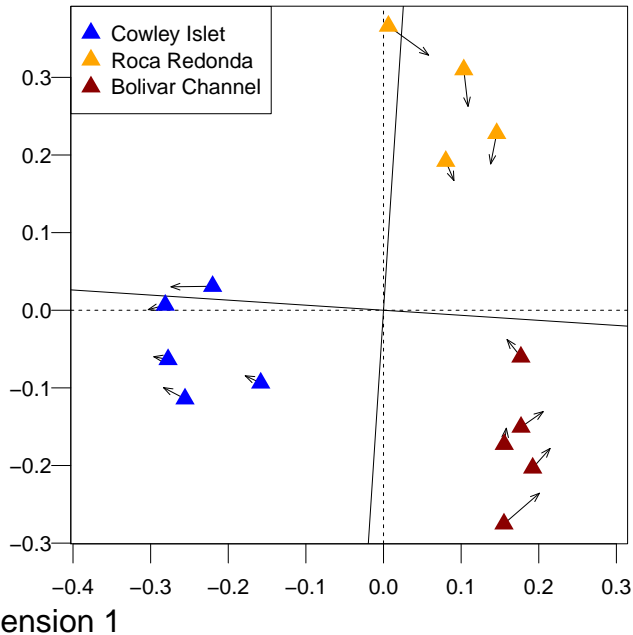

Supplement: peerj-06-5984-s003.pdf [file peerj-06-5984-s003.pdf]
